# Supplementary material for: The Role of Liver Fructose-1,6-Bisphosphatase in Regulating Appetite and Adiposity
Source: PubMed Central journal article supplement — Diabetes. 2012 Apr 13;61(5):1122–32. doi: 10.2337/db11-1511 (PMC3331739; doi:10.2337/db11-1511), 2012-04-13

SUPPLEMENTARY DATA

**Supplementary Table 1.** Liver ATP levels phosphorylated AMPK levels (as previously described (29,26)), GFAT mRNA levels (Mm00600127\_m1), FASN mRNA levels (Mm00662319\_m1), SCD1 mRNA levels (Mm01197142\_m1), SREBF1 levels (Mm00550338\_m1) (with 18s rNA as control) and plasma adiponectin concentration (Millipore RIA) in transgenic mice and negative littermates, approximately 16 weeks of age (n = 4-5 for each group).

|                                                   | NEG             | TG              |
|---------------------------------------------------|-----------------|-----------------|
| ATP<br>( $\mu\text{g}/\text{mg}$ protein)         | $3.8 \pm 1.1$   | $4.9 \pm 0.8$   |
| pAMPK<br>(Fold of NEG)                            | $1.0 \pm 0.3$   | $0.8 \pm 0.2$   |
| GFAT mRNA<br>(Fold of NEG)                        | $1.00 \pm 0.13$ | $1.40 \pm 0.15$ |
| FASN mRNA<br>(Fold of NEG)                        | $1.00 \pm 0.34$ | $0.93 \pm 0.23$ |
| SCD1 mRNA<br>(Fold NEG)                           | $1.00 \pm 0.22$ | $1.08 \pm 0.39$ |
| SREBF1 mRNA<br>(Fold NEG)                         | $1.00 \pm 0.21$ | $0.94 \pm 0.07$ |
| Plasma Adiponectin<br>( $\mu\text{g}/\text{mL}$ ) | $16.9 \pm 1.7$  | $15.6 \pm 1.8$  |

SUPPLEMENTARY DATA

**Supplementary Table 2.** Hepatic fructose-1,6-bisphosphate and fructose-6-phosphate. Liver homogenates were used to measure fructose-1,6-bisphosphate and fructose-6-phosphate as previously described (29). Fasted levels of gluconeogenic intermediates from transgenic and negative littermates, ~24 weeks of age (n = 3-4 for each group, \*p<0.05 vs. NEG).

|                                                 | NEG         | TG           |
|-------------------------------------------------|-------------|--------------|
| Fructose-1,6-bisphosphate (mmol/min/μg protein) | 0.11 ± 0.01 | *0.43 ± 0.07 |
| Fructose-6-phosphate (mmol/min/μg protein)      | 0.99 ± 0.46 | *3.84 ± 0.90 |

**Supplementary Figure 1.** Characterisation of hepatic male FBPase transgenic mice. Body weights of negative (○), hemizygous transgenic (●) and homozygous transgenic (◐) male mice from homozygous breeding (a) (n=7-10, AUC \*p<0.05 vs. NEG).

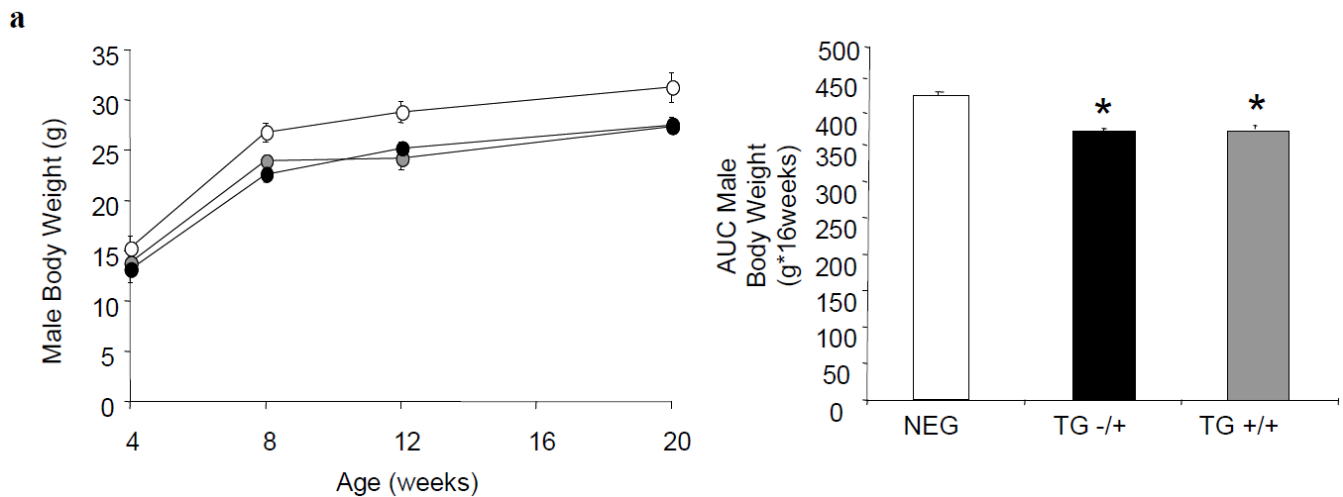

SUPPLEMENTARY DATA

**Supplementary Figure 2.** Characterisation of transgenic mice over-expressing FBPase in the liver and hypothalamus. Body weights of male negative (○) and transgenic (●) mice from hemizygous breeding from 4 weeks of age to 22 weeks old (a) (n=10, AUC \*p<0.05 vs. NEG). Body weights of female negative (○) and transgenic (●) mice from hemizygous breeding (b) (n=10, AUC \*p<0.05 vs. NEG). Fat pad mass of both female and male hemizygous transgenic mice (black bars) compared with their negative littermates at 24 weeks of age (white bars) (c) (n=10 for NEG, \*p<0.05). Average daily food intake of both female and male hemizygous transgenic mice (black bars) compared with negative littermates (white bars) (d) (n=10, \*p<0.05 vs. NEG). Physical activity measurements at 23 weeks of age of female and male negative (white bars) and hemizygous transgenic mice (black bars) (e) (n=10).

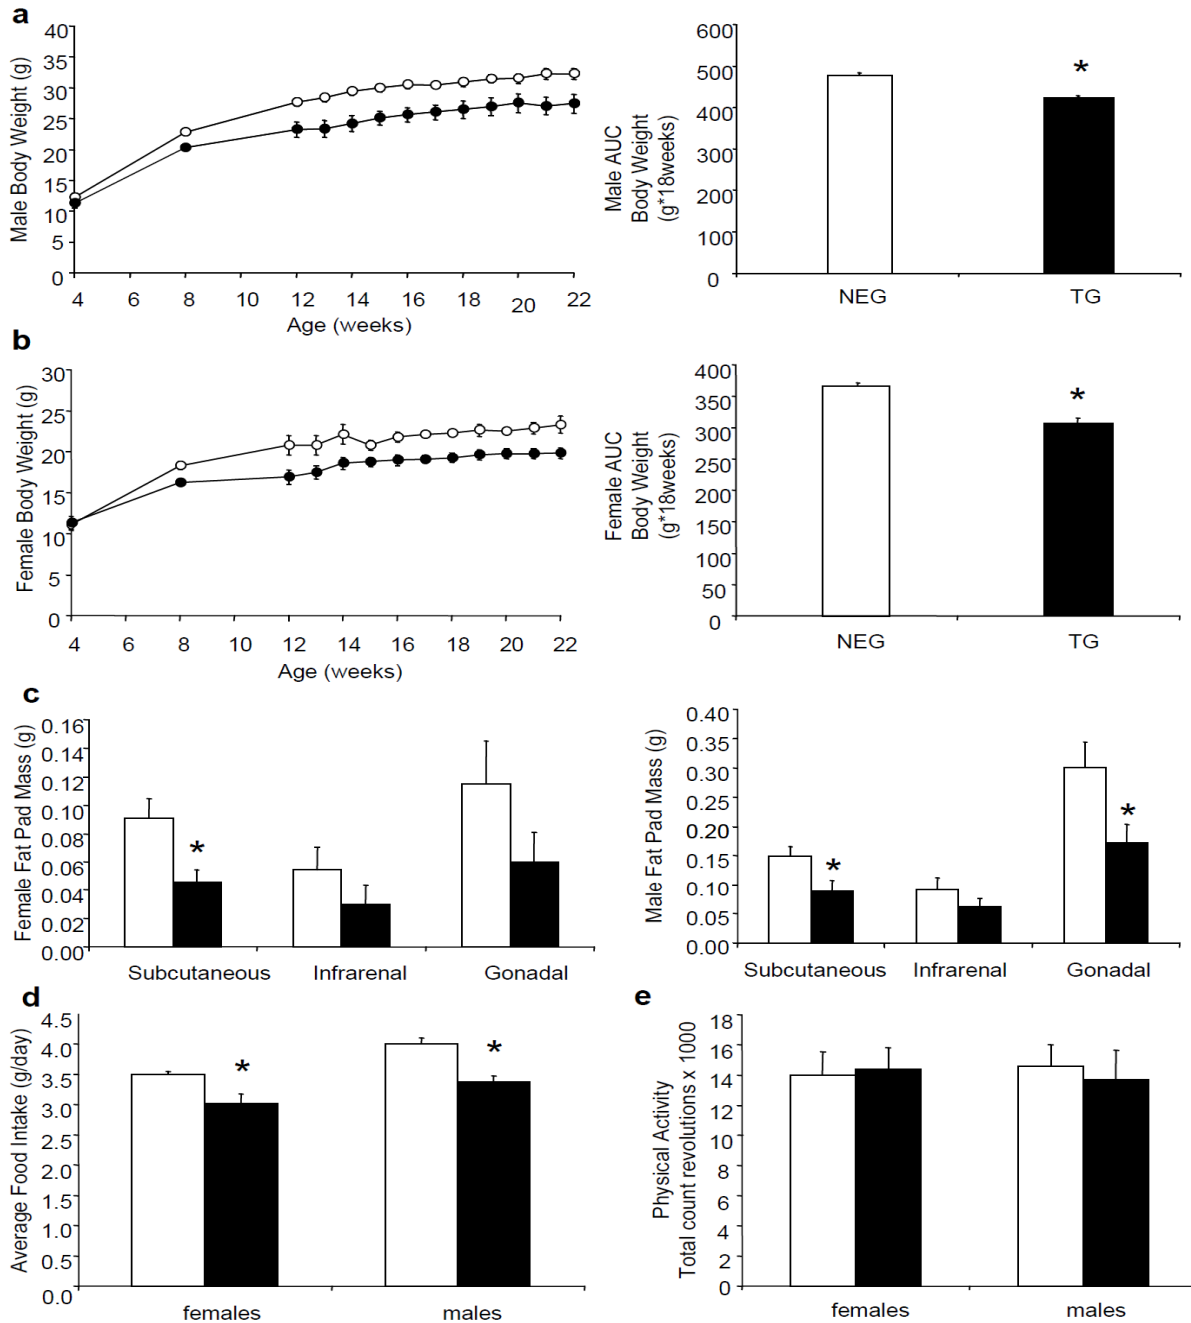

Supplement: supp_db11-1511_DB111511SupplementaryData.pdf [file supp_db11-1511_DB111511SupplementaryData.pdf]
